# Supplementary material for: Synthesis and electro-optic activities of new side-chain polycarbonates containing nonlinear optical chromophores and isolation groups
Source: Royal Society of Chemistry journal article supplement (doi:10.1039/c3ra45514a), 2013-11-05
Supplement: c3ra45514a.pdf [file c3ra45514a.pdf]

# Synthesis and Electro-optic Activities of New Side-chain Polycarbonates Containing Nonlinear Optical Chromophores and Isolation Groups

Guowei Deng,<sup>ab</sup> Heyan Huang,<sup>ab</sup> Chengcheng Peng,<sup>ab</sup> Airui Zhang,<sup>ab</sup> Maolin Zhang,<sup>a</sup> Shuhui Bo,<sup>\*a</sup> Xinhou Liu,<sup>a</sup> Zhen Zhen<sup>a</sup> and Ling Qiu.<sup>\*a</sup>

<sup>a</sup> Key Laboratory of Photochemical Conversion and Optoelectronic Materials, Technical Institute of Physics and Chemistry, Chinese Academy of Sciences, Beijing, 100190, P.R.China. Email: boshuhui@mail.ipc.ac.cn, qiuling@mail.ipc.ac.cn. Fax: +86 10 62554670.

<sup>b</sup> University of Chinese Academy of Sciences, Beijing 100049, China.

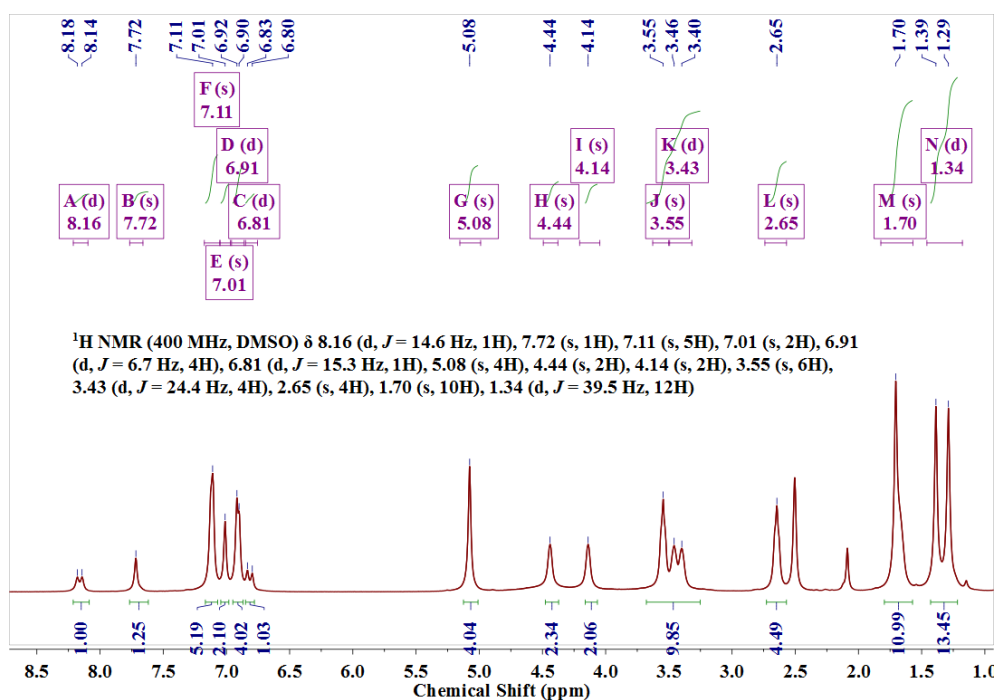

Figure S1 <sup>1</sup>H NMR of JTCFC

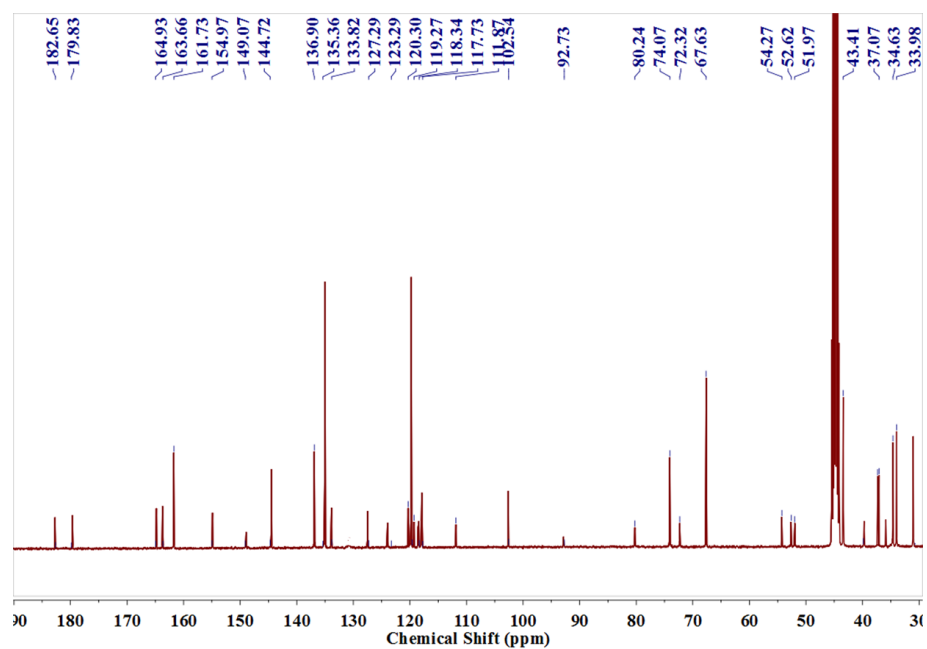

Figure S2  $^{13}\text{C}$  NMR of JTCFC

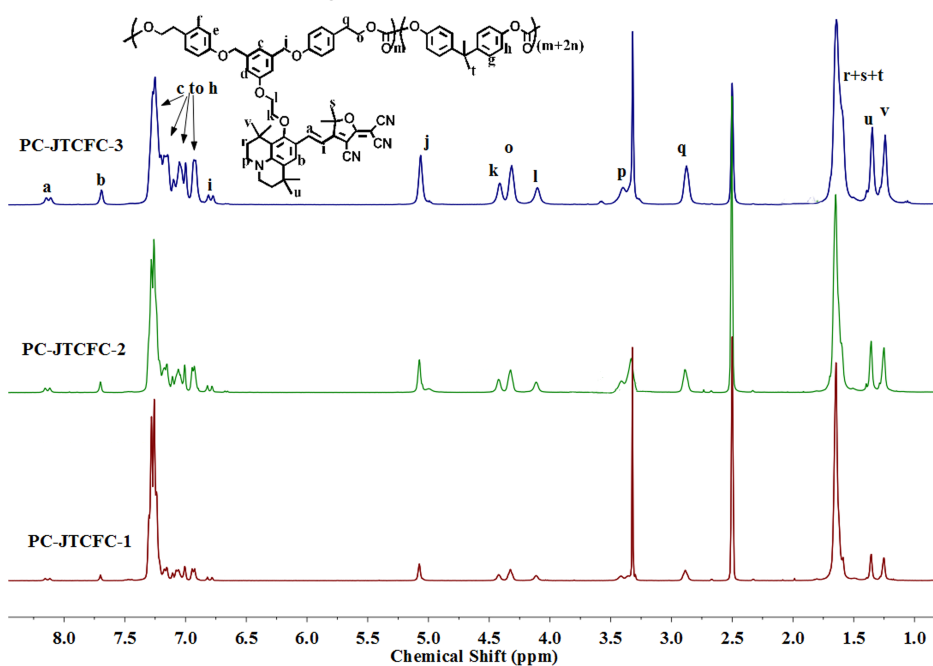

Figure S3  $^1\text{H}$  NMR spectra of PC-JTCFCs

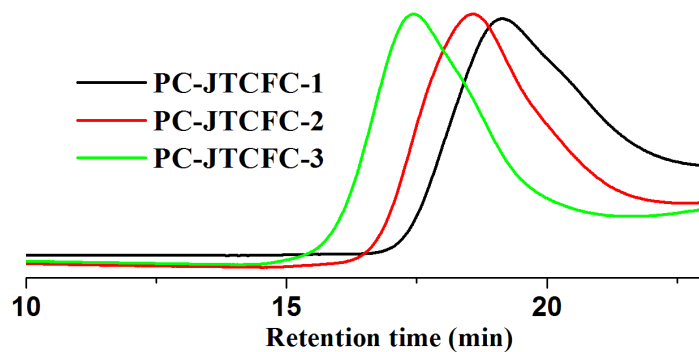

Figure S4 GPC traces for PC-JTCFC

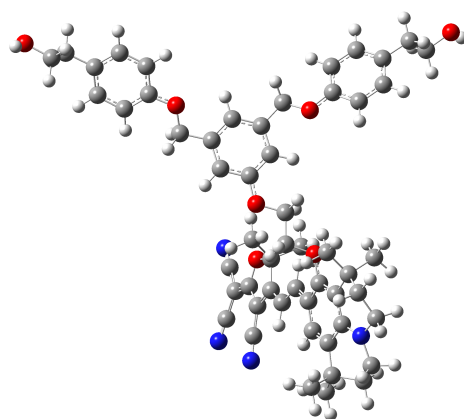

Figure S5 Modified dendritic chromophore structure ( the direction was paralleled the D- $\pi$ -A plane)

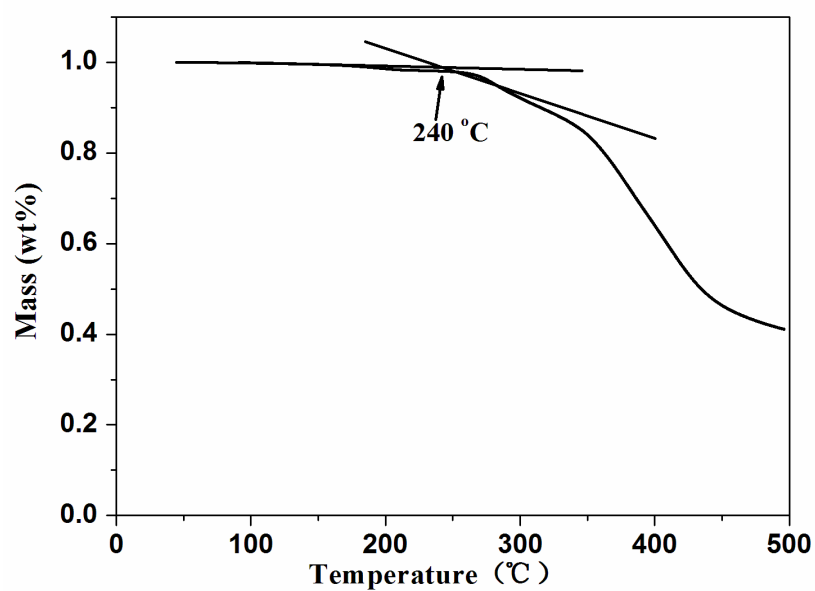

Figure S6 TGA curve of JTCFC
